# Supplementary material for: Disrupted Mitochondrial Network Drives Deficits of Learning and Memory in a Mouse Model of FOXP1 Haploinsufficiency
Source: MDPI journal article supplement (doi:10.3390/genes13010127), 2022-01-11
Supplement: s1 [file s1]

**Table S1: Primer list**

| <b>Genes</b>                    | <b>Sequence</b>                    |
|---------------------------------|------------------------------------|
| <i>Foxp1</i> 430bp 1            | 5'-CCTCTGGCGATGAACCTAGTGGT-3'      |
| <i>Foxp1</i> 430bp 2            | 5'-AGCCACACTTTCTCTCAGGATGT-3'      |
| <i>Foxp1</i> 280bp 1            | 5'-AGCGCATGCTCCAGACTGCCTTG-3'      |
| <i>Foxp1</i>                    | For 5'-AGAGCGCCTGCAAGCCATGA-3'     |
|                                 | Rev 5'-GGCGGTGGGGGTTGTTGGAG-3'     |
| <i>Foxo1</i>                    | For 5'-AAGAGCGTGCCCTACTTCAA-3'     |
|                                 | Rev 5'-CTCCCTCTGGATTGAGCATC-3'     |
| <i>Hprt1</i>                    | For 5'-TCCTCCTCAGACCGCTTTT-3'      |
|                                 | Rev 5'-CCTGGTTCATCATCGCTAATC-3'    |
| <i>Sdha1</i>                    | For 5'-CATGCCAGGGAAGATTACAAA-3'    |
|                                 | Rev 5'-GTTCCCCAAACGGCTTCT-3'       |
| <i>Pgc-1<math>\alpha</math></i> | For 5'-GGACGGAAGCAATTTTCAA-3'      |
|                                 | Rev 5'-TTACCTGCGCAAGCTTCTCT-3'     |
| <i>Tfam</i>                     | For 5'-TCTGTCTCCTGAGGAAAAGCAG-3'   |
|                                 | Rev 5'-ACTTCGTCCAACCTCAGCCA-3'     |
| <i>D-loop</i>                   | For 5'-GACCAACATAACTGTGGTGTCA-3'   |
|                                 | Rev 5'-ATTCTTCTCCGTAGGTGCGTCTAG-3' |
| <i>16srRNA</i>                  | For 5'-CCGCAAGGGAAAGATGAAAGAC-3'   |
|                                 | Rev 5'-TCGTTTGGTTTCGGGGTTTC-3'     |
| <i>Nd1</i>                      | For 5'-CTAGCAGAAACAAACCGGGC-3'     |
|                                 | Rev 5'-CCGGCTGCGTATTCTACGTT-3'     |
| <i>B2m</i>                      | For 5'-TGTCAGATATGTCCTTCAGCAAGG-3' |
|                                 | Rev 5'-TGCTTAACTCTGCAGGCGTATG-3'   |
| <i>Hk2</i>                      | For 5'-GCCAGCCTCTCCTGATTTTAGTGT-3' |
|                                 | Rev 5'-GGGAACACAAAAGACCTCTTCTGG-3' |

**Table S2: Antibody list**

| <b>Primary Antibody</b>                | <b>Supplier</b>              | <b>Application&amp;<br/>dilution</b> | <b>Catalog #</b> | <b>RRID</b> |
|----------------------------------------|------------------------------|--------------------------------------|------------------|-------------|
| Anti-Bcl-2 antibody                    | Abcam                        | WB 1:1000                            | ab692            | AB_305670   |
| Anti-FOXP1 antibody (rabbit)           | Abcam                        | WB 1:1000                            | ab16645          | AB_732428   |
| Anti-PGC-1 Alpha antibody              | Abcam                        | WB 1:1000                            | ab54481          | AB_881987   |
| Anti-Mitofusin 1 antibody              | Abcam                        | WB 1:1000                            | ab104274         | AB_10712138 |
| Anti-TFAM antibody                     | Abcam                        | WB 1:1000                            | ab131607         | AB_11154693 |
| Anti-TTC11/FIS1 antibody               | Abcam                        | WB 1:1000                            | ab71498          | AB_1271360  |
| Anti-GAPDH rabbit antibody             | Abcam                        | WB 1:5000                            | ab9485           | AB_307275   |
| Anti-GAPDH mouse<br>antibody           | Abcam                        | WB 1:5000                            | ab8245           | AB_2107448  |
| COX IV Antibody                        | Cell Signaling<br>Technology | WB 1:1000                            | 4844S            | AB_2085427  |
| Foxo1 Rabbit mAb                       | Cell Signaling<br>Technology | WB 1:1000                            | 2880S            | AB_2106495  |
| LC3A/B (D3U4C) Rabbit<br>mAb           | Cell Signaling<br>Technology | WB 1:1000                            | 12741S           | AB_2617131  |
| Purified Mouse Anti-OPA1               | BD Biosciences               | WB 1:1000                            | 612606           | AB_399888   |
| Purified Mouse Anti-DLP1               | BD Biosciences               | WB 1:1000                            | 611112           | AB_398423   |
| Parkin (Prk8) Mouse mAb                | Cell Signaling<br>Technology | WB 1:1000                            | 4211S            | AB_2159920  |
| PINK1 rabbit polyclonal<br>antibody    | Proteintech                  | WB 1:1000                            | 23274-1-AP       | AB_2879244  |
| Purified Mouse Anti-<br>Cytochrome C   | BD Biosciences               | WB 1:1000                            | 556433           | AB_396417   |
| Recombinant Anti-Bax<br>antibody [E63] | Abcam                        | WB 1:1000                            | ab32503          | AB_725632   |
| SOD2 antibody                          | GeneTex                      | WB 1:1000                            | GTX116093        | AB_10624558 |

| <b>Secondary Antibody</b>          | <b>Supplier</b>       | <b>Application&amp;<br/>dilution</b> | <b>Catalog #</b> | <b>RRID</b> |
|------------------------------------|-----------------------|--------------------------------------|------------------|-------------|
| IRDye 800CW Donkey anti-<br>Rabbit | LI-COR<br>Biosciences | WB 1:10000                           | 926-32213        | AB_621848   |
| IRDye 680CW Donkey anti-<br>Mouse  | LI-COR<br>Biosciences | WB 1:10000                           | 926-68072        | AB_10953628 |
